# Supplementary material
Source: publisher figshare collection journal article supplement (https://sage.figshare.com/ndownloader/files/15025973)
Supplement: Supplementary file 1 [file 15025973]

## **When better seems bigger: ESM 3**

### **Study 2 – Results for participant height, weight, and sex effects**

#### **Study 2 height**

Participant sex ( $p = .296$ ; bootstrap:  $p = .098$ ), team ( $p = .460$ ; bootstrap:  $p = .145$ ), did not have a significant effect on continuous height estimation

#### **Study 2 weight**

Team ( $p = .779$ ; bootstrap:  $p = .517$ ), fandom ( $p = .423$ ), and participant sex ( $p = .214$ ) did not have a significant effect on continuous weight estimation. However, bootstrapping revealed that both fandom ( $p = .050$ , 95% CI  $[-.00, .04]$ ) and participant sex ( $p = .032$ , 95% CI  $[1.05, 2.83]$ ) did have a significant effect on estimated weight. Furthermore, men ( $M = .512$ ,  $SD = 14.07$ ) estimated the players as heavier than women ( $M = -2.99$ ,  $SD = 14.28$ ) did.

#### **Continuous height repeated measures**

Participant sex ( $p = .750$ ), did not have a significant effect on continuous height estimation.

#### **Continuous weight repeated measures**

Participant sex ( $p = .127$ ), did not have a significant effect on continuous weight estimation.

Previous findings that men overestimate more than women do were only confirmed for the weight estimations.

## Tables with results Study 2

ESM Table 5

*Linear mixed models with estimated height in sliders Study 2*

| Parameter             | Model 1  |           |             | Model 2  |           |             | Model 3  |           |             |
|-----------------------|----------|-----------|-------------|----------|-----------|-------------|----------|-----------|-------------|
|                       | <i>b</i> | <i>SE</i> | 95% CI      | <i>b</i> | <i>SE</i> | 95% CI      | <i>b</i> | <i>SE</i> | 95% CI      |
| Intercept             | -3.94*   | 1.53      | -6.94, -.95 | -4.18    | 2.19      | -8.49, .14  | -4.06    | 2.19      | -8.38, 2.26 |
| Pp sex                | 1.91     | 1.28      | -.60, 4.41  | 1.83     | 1.83      | -1.78, 5.44 | 1.92     | 1.83      | -1.69, 5.53 |
| Estimated performance | .21**    | .03       | .15, .27    | .11**    | .03       | .05, .17    | .13**    | .04       | .07, .20    |
| Team                  | .85      | .98       | -1.08, 2.77 | 1.03     | 1.41      | -1.74, 3.81 | 1.04     | 1.41      | -1.73, 3.81 |
| Fandom                | .03      | .01       | .00, .06    | .03      | .02       | -.01, .08   | .03      | .02       | -.01, .07   |

Models: (1) fixed main effects only; (2) fixed main effects and random intercept; (3) random slopes and random intercept

\* $p < .05$ , \*\* $p < .01$

ESM Table 6

*Linear mixed models with estimated weight in sliders Study 2*

| Parameter             | Model 1  |           |              | Model 2  |           |             | Model 3  |           |             |
|-----------------------|----------|-----------|--------------|----------|-----------|-------------|----------|-----------|-------------|
|                       | <i>b</i> | <i>SE</i> | 95% CI       | <i>b</i> | <i>SE</i> | 95% CI      | <i>b</i> | <i>SE</i> | 95% CI      |
| Intercept             | -4.31*   | 1.65      | -7.55, -1.07 | -4.55    | 2.69      | -9.85, .75  | -4.07    | 2.65      | -9.31, 1.17 |
| Pp sex                | 3.03*    | 1.38      | -.32, 5.74   | 2.95     | 2.25      | -1.49, 7.38 | 2.79     | 2.24      | -1.63, 7.21 |
| Estimated performance | .20**    | .03       | .14, .27     | .10*     | .03       | .04, .16    | .10*     | .04       | .04, .17    |
| Team                  | .29      | 1.06      | -1.80, 2.37  | .48      | 1.73      | -2.92, 3.89 | .49      | 1.72      | -2.92, 3.89 |
| Fandom                | .02      | .02       | -.01, .05    | .03      | .03       | -.03, .08   | .03      | .03       | -.03, .07   |

Models: (1) fixed main effects only; (2) fixed main effects and random intercept; (3) random slopes and random intercept

\* $p < .05$ , \*\* $p < .01$
